1 **Title: Genome-wide identification and expression analysis of the *FAR***  
2 **gene family in hexaploid wheat (*Triticum aestivum* L.)**

3 Shandang Shi<sup>1#</sup>, Guaiqiang Chai<sup>1,2#</sup>, Hui Ren<sup>1</sup>, Wenzhi Nan<sup>1,2</sup>, Hongqi Wu<sup>1</sup>,  
4 Yong Wang<sup>1</sup>, Chunlian Li<sup>1\*</sup>, Zhonghua Wang<sup>1\*</sup>

5 <sup>1</sup>State Key Laboratory of Crop Stress Biology for Arid Areas, College of  
6 Agronomy, Northwest A&F University, Yangling, Shaanxi 712100, China.

7 <sup>2</sup>College of Life Sciences, Yulin University, Yulin, Shaanxi 719000, China.

8 #Those authors have contributed equally to this work.

9 \*Corresponding author, e-mail: [zhonghuawang@nwsuaf.edu.cn](mailto:zhonghuawang@nwsuaf.edu.cn) (Zhonghua  
10 Wang); [lclian@163.com](mailto:lclian@163.com) (Chunlian Li).

11

12 **Abstract:** Fatty acyl-CoA reductase (*FAR*) is involved in the biosynthesis of  
13 primary alcohols, which are waxy constituents that play an important role in  
14 plant stress. Previous studies have shown that primary alcohol is the most  
15 important component in the wheat seeding stage and accounts for more than  
16 80% of the total composition. To date, eight *FAR* genes have been identified in  
17 wheat, but there has not been a systematic analysis. In this study, a  
18 comprehensive overview of the *TaFAR* gene family was performed, including  
19 analyses of the phylogenetic relationship, the multiple sequence alignment, the  
20 conserved motif distribution and the expression pattern. The result showed  
21 that a total of 41 wheat *FAR* genes were identified and designated *TaFAR1-A–*  
22 *TaFAR22-D*; all *FAR* genes were divided into six classes according to their

23 phylogenetic relationship, and most of the *FAR* genes might be related to  
24 wheat cuticular wax synthesis. The analysis of the promoter binding site  
25 showed that *TaFAR* genes could be regulated by the MYB transcription factor  
26 and could be used as target genes for hormone regulation under adverse  
27 conditions, especially during a drought. This study provides a basis for further  
28 analyses of the *TaFAR* gene function and of upstream regulatory genes.

29

30 **Keywords: fatty acyl-CoA reductase, cuticular wax, *Triticum aestivum***

31

## 32 **Introduction**

33 Wheat (*Triticum aestivum*) is one of the world's most important food crops and  
34 feeds one-fifth of the population. Wheat yield is constrained by many factors,  
35 including biotic and abiotic stresses [1]. Drought is a major threat to wheat  
36 production [2]. The surface of wheat is covered with cuticular wax, which plays  
37 important roles in drought tolerance by limiting nonstomatal water loss [3].  
38 Cuticular wax is a complex mixture of lipids and consists of very-long-chain  
39 fatty acids (VLCFAs) and their derivatives, including aldehydes, alkanes,  
40 alcohols, wax esters and ketones [4-7]. At the wheat seeding stage, primary  
41 alcohol is the most important component of cuticular wax and accounts for  
42 more than 80% of the total composition. Previous studies demonstrated that  
43 primary alcohols were synthesized by fatty acyl-CoA reductase (FAR) [8-13]. In  
44 *Arabidopsis*, the gene family contains eight members, and only the  
45 *AtFAR3/CER4* gene was involved in the primary alcohols biosynthesis of  
46 cuticular wax. However, eight *TaFAR* genes that are related to the biosynthesis  
47 of cuticular wax were identified in wheat, which suggested that there are a  
48 series of *TaFAR* genes involved in wax biosynthesis in wheat. With the gradual  
49 improvement of whole-genome sequencing and the annotation of wheat, it was  
50 possible to discover its *FAR* gene family [14].

51 A typical FAR protein contained an NAD(P)H binding Rossmann-fold (NADB)  
52 domain with Pfam ID: PF07993 and a fatty acyl-CoA reductase ('FAR\_C')  
53 domain with PF03015 [15]. Thus, FARs were predicted to be extended

54 short-chain dehydrogenase/reductase proteins at the N-terminus with an  $\alpha/\beta$   
55 folding pattern, a central  $\beta$ -sheet and a fatty acyl-CoA reductase domain at the  
56 C-terminus. All plant FARs contained two conserved motifs: the  
57 TGXXGXX(G/A) motif, which is involved in binding of NAD(P)H, and the  
58 YXXXK active site motif, which falls into the SDR117E family, which is a  
59 short-chain dehydrogenase/reductase superfamily [16-18]. In addition,  
60 because the first cloned *FAR* gene from *A. thaliana* encoded the MALE  
61 STERILITY2 (*FAR2/MS2*), the *FAR\_C* domain was often annotated in  
62 databases as the “male sterile” domain. However, this annotation was  
63 outdated, because only two proteins in *Arabidopsis* and rice, *At FAR2/MS2*  
64 and *OsFAR2/DPW*, affect male fertility [19, 20].

65 The *FAR* gene is also involved in the biosynthesis of suberin polyester and  
66 plant pollen development in addition to the synthesis of waxy components [21,  
67 22]. Different *FAR* genes generally showed different functions according to the  
68 synthesized acyl chain lengths [7]. *AtFAR2/MS2* synthesizes primary alcohol  
69 during the stage of pollen exine development [23, 24]. *AtFAR3/CER4* was  
70 involved in the formation of C24:0-C30:0 primary alcohols in the cuticular wax  
71 of aerial organs [25]. *AtFAR1*, *AtFAR4* and *AtFAR5* generate 18:0, 20:0 and  
72 22:0 fatty alcohols, respectively, which are present in root wax and suberin  
73 polyester [22]. In *Monocotyledonous*, partial genes of wheat, *Brachypodium*  
74 *distachyon* and rice had been identified. *OsFAR2/DPW*, an orthologous gene  
75 of *AtFAR2/MS2* in rice, affects the development and fertility of pollen. The

76 expression of *OsFAR2/DPW* led to the formation of C16:0 primary alcohol by  
77 combining the substrates of C16:0 fatty acyl-CoA [26]. Three *FAR* genes had  
78 been identified in *Brachypodium distachyon*. The heterologous expression of  
79 *BdFAR1* results in the formation of C22:0 primary alcohol in yeast, while the  
80 expression of *BdFAR2* and *BdFAR3* led to the production of C26:0 primary  
81 alcohol [21]. In wheat, the function of eight *FAR* genes had been elucidated.  
82 The expression of *TaFAR1* and *TaFAR5* could produce C22:0 fatty alcohol in  
83 yeast and C26:0, C28:0, and C30:0 in tomato leaves. *TaFAR5* was also  
84 identical to *TaAA1b* as an anther-specific gene [1, 18]. *TaFAR2*, *TaFAR3* and  
85 *TaFAR4* were involved in the formation of C18:0, C28:0 and C24:0 fatty  
86 alcohols in yeast, respectively. *TaFAR4* was also identical to *TaAA1c* [17].  
87 *TaFAR6* and *TaFAR8* catalyze the synthesis of C24:0, while *TaFAR7*  
88 synthesizes C26:0 in yeast [14]. *TaFAR6* was also identical to *TaMSF\_2* as  
89 anther male sterility gene [27]. In addition, *TaMSF\_1*, an anther male sterility  
90 gene, and *TaAA1a*, a fatty alcohols synthesis gene, were identified [1, 27]. In  
91 general, 8 *FAR* genes in wheat were characterized, but the information of the  
92 whole family is still unknown.

93 In this study, 41 *FAR* gene family members were identified from the bread  
94 wheat genome, and the detailed information on sequence homology, the  
95 phylogenetic relationship, the promoter analysis, and the expression patterns  
96 in various tissues were analyzed. This will be useful for further systematic  
97 functional characterization of wheat *FAR* genes.

## 98 **Materials and methods**

### 99 **Plant materials and experimental design**

100 Hexaploid wheat Chinese Spring (CS) was grown in a greenhouse of  
101 Northwest A & F University. The tissue samples were harvested at different  
102 stages, including leaves at 28-d-old, root at 28-d-old, spike at 39-d-old and  
103 stem at 65-d-old. Each sample was collected in at least three replicates, were  
104 quickly frozen in liquid nitrogen and were immediately stored at  $-80^{\circ}\text{C}$  for  
105 further use.

106

### 107 **Identification of the *TaFAR* gene family**

108 Two methods were used to identify wheat *FAR* genes. First, the protein  
109 database file of the whole wheat genome was downloaded from  
110 *EnsemblPlants* (<http://plants.ensembl.org/index.html>). A local BLASTP search  
111 was performed using *Arabidopsis* *FAR* proteins as queries against the wheat  
112 protein database with an e-value of  $e^{-10}$ . Second, the ID of the conserved  
113 domain 'PF07993' was used to search genes in the *EnsemblPlants* database.  
114 Then, redundant candidates obtained by the two search methods were  
115 removed. An InterProScan Sequence Search (<http://www.ebi.ac.uk/interpro/>)  
116 was used to determine the presence of the *FAR* domain. Information on the  
117 coding sequence and the protein sequence was also obtained from the  
118 *EnsemblPlants* database. The Compute/Mw tool  
119 ([http://web.expasy.org/compute\\_pi/](http://web.expasy.org/compute_pi/)) was used to predict the isoelectric point

120 (pI) and the molecular weight (MW) of the wheat FARs [28].

121

## 122 **Sequence and conserved domain analysis of *TaFARs***

123 The ClustalX program was used for multiple sequence alignments with default  
124 parameters [29]. Then, protein sequences were used to examine the  
125 conserved domain using a CD search  
126 (<https://www.ncbi.nlm.nih.gov/Structure/cdd/wrpsb.cgi>) and motifs using a  
127 MEME analysis online (<http://meme-suite.org/tools/meme>) with default settings  
128 [30, 31].

129

## 130 **Phylogenetic and promoter binding site analysis of *TaFARs***

131 A phylogenetic analysis was performed using MEGA 7 software through the  
132 method of neighbor-joining, and a bootstrap test was performed with 1000  
133 replicates [32]. Two phylogenetic trees were produced: one contained only  
134 wheat FARs, and one used FAR proteins from wheat, *Arabidopsis*, rice, and  
135 *Brachypodium distachyon*. The promoter binding site was predicted by using  
136 1500 bp upstream flanks of *TaFAR* genes in a *PlantCARE* database  
137 (<http://bioinformatics.psb.ugent.be/webtools/plantcare/html/>) [33].

138

## 139 **RNA-sequencing data analysis**

140 The RNA-sequencing (RNA-seq) data of CS across the whole life cycle of  
141 wheat were downloaded from the WheatExp database

142 (<https://wheat.pw.usda.gov/WheatExp/>). The transcript abundance of given  
143 genes was represented by the FPKM (fragments per kilobase of exon model  
144 per million mapped reads) values from diverse developmental processes. Heat  
145 maps of the *TaFAR* gene expression were generated using Cluster  
146 (<http://soft.bio1000.com/show-119.html>) and TreeView  
147 (<http://soft.bio1000.com/show-17.html>) software based on the FPKM values  
148 [34].

149

### 150 **Quantitative real-time PCR**

151 The Plant RNA Purification Reagent (Invitrogen, USA) was used to extract the  
152 total RNA from each sample. The cDNA was synthesized using a PrimeScript  
153 reagent kit after treatment with RNase-free DNase I (Takara) according to the  
154 manufacturer's instructions. The final cDNA samples were diluted 10-fold and  
155 were stored at  $-20^{\circ}\text{C}$  for further use. For normalizing the gene expression in  
156 different RNA samples, the wheat *ACTIN* gene was used as an internal control  
157 [14]. The primers were designed using Primer Premier 5  
158 (<http://soft.bio1000.com/show-102.html>) software (Table S1). The expression  
159 level of *TaFAR* genes was measured by quantitative real-time PCR (qRT-PCR)  
160 using a Bio-Rad Real-Time System (CFX96). Two independent biological  
161 repeats and three technical repetitions were produced and the quantification  
162 analysis was performed as described by Ma and Zhao [35].

### 163 **Data availability**



164

165 The authors affirm that all data necessary for confirming the conclusions of the  
166 article are present within the article, figures, and tables. Supplemental material  
167 available at Figshare: [10.6084/m9.figshare.7110650](https://www.figshare.com/entries/10.6084/m9.figshare.7110650).

## 168 **Results**

### 169 **Identification and sequence analysis of *TaFAR* genes**

170 By searching in the database and submitting sequences to InterProScan, 41  
171 *TaFAR* genes were finally identified. According to their phylogenetic  
172 relationship, those *TaFARs* family members were grouped into 22 clusters  
173 named *TaFAR1-A* to *TaFAR22-D* (Table 1, Figure 1A). Among them, 13  
174 clusters were assigned to various A, B or D subgenomes. Those clusters were  
175 considered to be homoeologous copies of one *TaFAR* gene. The *TaFAR* gene  
176 information is listed in Table 1 and included the gene name, sequence  
177 accession number, protein length, MW and pI.

178

### 179 **Sequence analysis of *TaFAR* proteins**

180 A multiple sequence alignment was performed using the amino acid  
181 sequences of *TaFARs*, which suggested that the *TaFAR* proteins contained  
182 two conserved motifs, the NAD(P)H binding site motif and the active site motif  
183 (Figure S1). The result of the conserved domain analysis showed that all  
184 *TaFAR* proteins contained conserved domains: FAR-N\_SDR\_e and FAR\_C  
185 (Figure 1B). Among them, the SDR superfamily and FAR-N\_SDR\_e and the  
186 FAR\_C superfamily and FAR\_C had very similar functions according to the  
187 description on the InterProScan Sequence Search website. MEME analysis  
188 divided the protein sequence into 8 motifs (motifs 1–8), which are represented  
189 by different colors (Figure S2B). The *FAR* proteins are arranged according to

190 the phylogenetic tree (Figure S2B). In addition, the extent of the conservation  
191 of every motif is represented by the height of each character by the online  
192 MEME (Figure S2A). The result of the sequence analysis showed that all  
193 TaFAR proteins are highly conserved.

194

### 195 **Phylogenetic analysis of genes in wheat**

196 To further investigate the phylogenetic relationships between wheat,  
197 *Arabidopsis*, rice, and *Brachypodium distachyon*, a phylogenetic tree was  
198 constructed by aligning the protein sequences of 41 TaFARs, 8 AtFARs, 6 Bd  
199 FARs and 8 OsFARs. There were 65 FARs divided into seven groups named  
200 Classes 1,2a, 2b, 3–6. It is noteworthy that Class 2b contained only six  
201 members from *Arabidopsis*. The asterisk-tagged genes had been identified in  
202 wheat previously [5, 12]. The result showed that Classes 1, 3, 4, and 5 contain  
203 asterisk-tagged genes, which suggested that 32 *TaFAR* genes could be  
204 involved in wax synthesis. This result provides a basis for us to infer the  
205 function according to the phylogenetic relationship (Figure 2).

206

### 207 **Expression analysis of *TaFAR* genes in wheat**

208 The transcript abundances of the *TaFAR* genes in various tissues are shown in  
209 Figure 3A. This result showed that almost all genes except *TaFAR8-A/B/D*  
210 have high expression levels during a certain period of the leaf. Most of the  
211 genes are also highly expressed in the stem and spike, and the expression of

212 some genes, including *TaFAR8-A/B/D* in spike\_z39, *TaFAR4-B/TaFAR1-B* in  
213 spike\_z65, *TaFAR20-B* in stem\_z65, are particularly high. Genes with a high  
214 expression in leaves, stem and spike could play an important role in plant  
215 cuticular wax synthesis. In addition, a small number of genes, including  
216 *TaFAR3-A/B/D* and *TaFAR5-B/D*, have high expressions in roots, and these  
217 genes may be related to the synthesis of suberin polyester (Figure 3A).  
218 Furthermore, a qRT-PCR analysis was used to test the consistency with the  
219 RNA-seq dataset. We randomly selected six genes to detect the expression  
220 levels of four tissues that correspond to the RNA-seq data. The results showed  
221 good consistency between the RNA-seq and the qRT-PCR data (Figure 3B).

222

### 223 **Promoter binding site analysis of *TaFARs***

224 In this study, we selected 12 sites that are associated with the stress response  
225 from a number of promoter *cis*-regulatory elements and demonstrated their  
226 distribution in the *TaFARs* gene family (Figure 4A). The information on  
227 promoters is shown in Figure 4B. Five sites had wide distribution in the  
228 *TaFARs* gene family. The MYB binding site involved in drought-inducibility  
229 (MBS) was distributed to all members, suggesting that *FAR* genes are  
230 regulated by the MYB transcription factor under drought stress. For three  
231 hormone-related sites, including the *cis*-acting element involved in abscisic  
232 acid responsiveness (ABRE), the *cis*-acting regulatory element involved in  
233 MeJA-responsiveness (CGTCA-motif), and the *cis*-acting element involved in

234 salicylic acid responsiveness (TCA-ELAMENT), almost all genes except  
235 *TaFAR14-A* contain at least one site, which suggests that *FAR* genes can  
236 respond to stress by binding hormone-including abscisic acid (ABA), salicylic  
237 acid (SA) or methyl jasmonate acid (MeJA). The cis-acting element involved in  
238 the defense and stress responsiveness (TC-RICH REPEATS) site is a  
239 cis-acting element that is involved in defense and stress responsiveness; its  
240 existence also proves that the *TaFARs* gene could respond to stress. Under  
241 heat treatment conditions, we analyzed the expression levels of eight genes  
242 that contain a cis-acting element involved in the heat stress responsiveness  
243 (HSE) site. The result showed that these genes had a consistent trend, in that  
244 the expression level decreased after one hour of treatment and increased after  
245 six hours of treatment (Figure 4C).

## 246 Discussion

247 Wax is one of the important substances for plant drought resistance [3]. In the  
248 last few years, studies indicated that wax plays important roles in preventing  
249 the nonporous loss of water in wheat leaves [36]. The *FAR* gene family plays a  
250 critical role in water retention and stress response by synthesizing primary  
251 alcohols, which is a component of cuticular wax and accounts for more than 80%  
252 of the total composition at the wheat seeding stage [1]. Eight *FAR* genes were  
253 previously reported in wheat; they play an important role in the wax synthesis  
254 of wheat leaves [1, 18, 14, 17]. In *Arabidopsis*, only the *AtFAR3/CER4* gene  
255 was involved in the primary alcohols synthesis of cuticular wax, yet there are  
256 eight members in the *FAR* gene family [25]. These results suggest that there  
257 are a large number of unknown *FAR* genes in wheat. In this study, 41 *FAR*  
258 genes were identified in wheat and all of the *FAR* genes, including *Arabidopsis*,  
259 rice, wheat and *Brachypodium distachyon*, were divided into seven classes  
260 according to the phylogenetic relationship. The eight genes that had been  
261 identified as being related to wax synthesis were distributed in Classes 1, 3, 4,  
262 and 5. In addition, all of the genes in these classes have high expression levels  
263 in leaves, stem or spike (Figure 3A); thus, we could infer that there might be 32  
264 *TaFAR* genes involved in the primary alcohols synthesis of wheat wax. In  
265 Class 2a, *AtFAR2* and *OsFAR2/DPW*, which are two male fertility genes,  
266 affected the development and fertility of pollen [19, 20], and we could  
267 speculate the possible functions of *TaFAR8-A/B/D* and *TaFAR1-A/B/D* in male

268 fertility. In addition, *AtFAR1*, *AtFAR4* and *AtFAR5* had high expressions in roots  
269 and were involved in the synthesis of suberin polyester [22], which indicates  
270 that these genes, including *TaFAR3-A/B/D* and *TaFAR5-B/D*, may be related to  
271 the synthesis of suberin polyester. These functional predictions need to be  
272 proven by further experiments.

273 Wheat production was threatened by abiotic and biotic stresses [1].  
274 Transcription factors and hormones are very important ways in which wheat  
275 plants respond to stress conditions. Current research showed that MYB  
276 transcription factors could regulate wax synthesis under drought conditions  
277 [37]. Plants could also resist drought by synthesizing the hormones of ABA,  
278 MeJA and Jasmonic acid JA [38, 39]. In this study, we analyzed the promoter  
279 binding site of *TaFARs* genes. Interestingly, all genes have an MBS site, which  
280 is the MYB binding site that is involved in drought-inducibility. The result  
281 showed that the *TaFAR* genes were indeed involved in drought resistance  
282 under the regulation of the MYB transcription factor, but the specific genes  
283 involved in regulation need further exploration. In our study, almost all of the  
284 *TaFAR* genes were contained in the hormone response sites of ABA, MeJA or  
285 JA. The result revealed that the *TaFAR* genes played an important role as  
286 target genes of ABA, MeJA or SA. In general, under drought conditions, the  
287 *TaFAR* genes were not only involved in the synthesis of cuticular wax by the  
288 regulation of MYB transcription factors but could also be used as target genes  
289 for hormones, including ABA, MeJA or SA, to resist drought. The wide

290 distribution of the TC-RICH REPEATS site in the promoter region of the TaFAR  
291 gene family also suggested that *TaFAR* genes could be involved in response to  
292 other kinds of stresses. In addition, the expression levels of eight *FAR* genes  
293 containing HSE sites showed the same trend under heat stress. This trend of  
294 first decline and then rise indicated that the *FARs* were downregulated genes  
295 under heat stress, and this process might be a negative feedback regulation.  
296 This study provided important information for our next study to find upstream  
297 regulatory genes.

#### 298 **Acknowledgements**

299 This study was supported by National Natural Science Foundation of China  
300 (31471568).

301



302 **Figure 1 Phylogenetic analysis and the conserved domain of *TaFAR***

303 **genes and proteins.** (A) Phylogenetic relationships of *TaFAR* proteins. The  
304 phylogenetic tree was produced using MEGA 7 software with the  
305 neighbor-joining method and bootstrap values were from 1000 replicates. (B)  
306 Two domains were found: FAR-N\_SDR\_e or SDR superfamily and FAR\_C or  
307 FAR\_C superfamily.

308 **Figure 2 Phylogenetic analysis between wheat, *Arabidopsis*, rice, and**

309 ***Brachypodium distachyon* FAR proteins.** Phylogenetic relationships of  
310 wheat, *Arabidopsis*, rice, and *Brachypodium distachyon* FAR proteins. The  
311 phylogenetic tree was produced using MEGA 7 software with the  
312 neighbor-joining method and bootstrap values were obtained from 1000  
313 replicates. These were divided into seven classes (Classes 1, 2a, 2b, 3-6), and  
314 Class 2b had no representative of wheat and contained only six members from  
315 *Arabidopsis*. The asterisk-tagged genes had been identified previously.

316 **Figure 3 Expression profiles and QRT-PCR analysis of *TaFAR* genes.** (A)

317 Expression profiles analysis in different organs and tissues, including root,  
318 stem, leaf, spike and grain, with three difference stages, respectively.  
319 grain\_z35 refers 35-d-old grain. The color scale represents different transcript  
320 abundances from low (blue) to high (red). (B) The consistency analysis of  
321 RNA-sequencing and qRT-PCR with regard to six *TaFAR* genes.

322 **Figure 4 Promoter binding site analysis of *TaFARs*.** (A) Distribution of

323 putative *cis*-regulatory elements in 1500 bp upstream regions of 41 *TaFAR*

324 genes. Red means there is this binding site; green means there is no such site.

325 (B) Information on the promoter binding site. (C) Analysis of the expression

326 levels of eight genes containing HSE under heat treatment conditions,

327 including 0 h (control), 1 h and 6 h.

328 **Figure S1 Multiple sequence alignment of TaFAR proteins.** A multiple

329 sequence alignment was performed using the ClustalX program with default

330 parameters. Two conserved motifs were marked by a horizontal line: the

331 NAD(P)H binding site motif (TGXXGXXG) and the active site motif (YXXXXK),

332 where X represents any amino acid.

333 **Figure S2 Conserved motifs of TaFAR proteins.** (A) Compositions of the

334 conserved motifs of TaFAR proteins. The extent of conservation of amino acid

335 identity was represented by the height of each character. (B) The motif

336 distribution of wheat, *Arabidopsis*, rice, and *Brachypodium distachyon* FAR

337 proteins was investigated using the MEME web server. The FAR proteins were

338 arranged according to the phylogenetic tree.

339 **Table 1. The FAR gene family in wheat (*Triticum aestivum*. L)**

340 **Table S1. Sequences of primers used in cloning and PCR reactions.**

341

342 **Reference**

- 343 [1] Y. Wang, M.L. Wang, Y.L. Sun, et al., FAR5, a fatty acyl-coenzyme A reductase, is  
344 involved in primary alcohol biosynthesis of the leaf blade cuticular wax in wheat (*Triticum*  
345 *aestivum* L.), J. Exp. Bot. 66 (2015) 1165-78. DOI: [10.1093/jxb/eru457](https://doi.org/10.1093/jxb/eru457)
- 346 [2] Z.M. Pei, Y. Murata, G. Benning, et al., Calcium channels activated by hydrogen peroxide  
347 mediate abscisic acid signalling in guard cells, Nature 406 (2000) 731-734.  
348 DOI: [10.1038/35021067](https://doi.org/10.1038/35021067)
- 349 [3] S. Lü, T. Song, D.K. Kosma, et al., Arabidopsis CER8 encodes LONG-CHAIN ACYL-COA  
350 SYNTHETASE 1 (LACS1) that has overlapping functions with LACS2 in plant wax and cutin  
351 synthesis, Plant J. 59 (2010) 553-564. DOI: [10.1111/j.1365-3113X.2009.03892.x](https://doi.org/10.1111/j.1365-3113X.2009.03892.x)
- 352 [4] L. Kunst, A.L. Samuels, Biosynthesis and secretion of plant cuticular wax, Prog. Lipid  
353 Res. 42 (2010) 51-80. DOI: [10.1016/S0163-7827\(02\)00045-0](https://doi.org/10.1016/S0163-7827(02)00045-0).
- 354 [5] L. Samuels, L. Kunst, R. Jetter, Sealing plant surfaces: cuticular wax formation by  
355 epidermal cells, Annu. Rev. Plant Biol. 59 (2008) 683-707.  
356 DOI: [10.1146/annurev.arplant.59.103006.093219](https://doi.org/10.1146/annurev.arplant.59.103006.093219)
- 357 [6] S.B. Lee, C.S. Mi, Recent advances in cuticular wax biosynthesis and its regulation in  
358 *Arabidopsis*, Mol Plant 6 (2013) 246-249. DOI: [10.1093/mp/sss159](https://doi.org/10.1093/mp/sss159)
- 359 [7] M.L. Wang, H.Q. Wu, J. Xu, et al., Five fatty acyl-Coenzyme A reductases are involved  
360 in the biosynthesis of primary alcohols in *Aegilops tauschii* leaves, Front. Plant Sci. 8  
361 (2017). DOI: [10.3389/fpls.2017.01012](https://doi.org/10.3389/fpls.2017.01012)
- 362 [8] J.G. Metz, M.R. Pollard, L. Anderson L, et al., Purification of a Jojoba Embryo fatty  
363 acyl-coenzyme A reductase and expression of its cDNA in high erucic acid rapeseed,

- 364 Plant Physiol. 122 (2000) 635-644. DOI: [10.1104/pp.122.3.635](https://doi.org/10.1104/pp.122.3.635)
- 365 [9] K. Moto, T. Yoshiga, M. Yamamoto, et al., Pheromone gland-specific fatty-acyl  
366 reductase of the silkworm, *Bombyx mori*, Proc. Natl. Acad. Sci. U. S. A. 100 (2003)  
367 9156-9161. DOI: [10.1073/pnas.1531993100](https://doi.org/10.1073/pnas.1531993100)
- 368 [10] J.B. Cheng, D.W. Russell, Mammalian wax biosynthesis. I. Identification of two fatty  
369 acyl-coenzyme A reductases with different substrate specificities and tissue distributions,  
370 J. Biol. Chem. 279 (2004) 37789-97. DOI: [10.1074/jbc.M406225200](https://doi.org/10.1074/jbc.M406225200)
- 371 [11] P. Teerawanichpan, X. Qiu, Fatty acyl-CoA reductase and wax synthase from euglena  
372 gracilis, in the biosynthesis of medium-chain wax esters, Lipids 45 (2010) 263-273. DOI:  
373 <https://doi.org/10.1007/s11745-010-3395-2>
- 374 [12] S. Fillet, J. Gibert, B. Suárez, et al., Fatty alcohols production by oleaginous yeast, J.  
375 Ind. Microbiol. Biotechnol. 42 (2015) 1463-1472. DOI: [10.1007/s10295-015-1674-x](https://doi.org/10.1007/s10295-015-1674-x)
- 376 [13] W. Wang, H. Wei, E. Knoshaug, et al., Fatty alcohol production in *Lipomyces starkeyi*  
377 and *Yarrowia lipolytica*, Biotechnol. Biofuels 9 (2016) 227. DOI:  
378 [10.1186/s13068-016-0647-2](https://doi.org/10.1186/s13068-016-0647-2)
- 379 [14] G. Chai, C. Li, F. Xu, et al., Three endoplasmic reticulum-associated fatty  
380 acyl-coenzyme a reductases were involved in the production of primary alcohols in  
381 hexaploid wheat ( *Triticum aestivum* L.), BMC Plant Biol. 18 (2018) 41.  
382 DOI: [10.1186/s12870-018-1256-y](https://doi.org/10.1186/s12870-018-1256-y)
- 383 [15] O. Rowland, F. Domergue, Plant fatty acyl reductases: enzymes generating fatty  
384 alcohols for protective layers with potential for industrial applications, Plant Sci. 193-194  
385 (2012) 28-38. DOI: [10.1016/j.plantsci.2012.05.002](https://doi.org/10.1016/j.plantsci.2012.05.002)

- 386 [16] M.G.M. Aarts, R. Hodge, K. Kalantidis, et al., The *Arabidopsis* MALE STERILITY 2  
387 protein shares similarity with reductases in elongation/condensation complexes, *Plant J.*  
388 12 (1997) 615-623. DOI: [10.1046/j.1365-313X.1997.d01-8.x](https://doi.org/10.1046/j.1365-313X.1997.d01-8.x)
- 389 [17] M.L. Wang, Y. Wang, H.Q. Wu, et al., Three *TaFAR* genes function in the biosynthesis  
390 of primary alcohols and the response to abiotic stresses in *Triticum aestivum*, *Sci. Rep.* 6  
391 (2016) 25008. DOI: [10.1038/srep25008](https://doi.org/10.1038/srep25008)
- 392 [18] Y. Wang Y, M.L. Wang, Y.L. Sun, et al., Molecular characterization of *TaFAR1* involved  
393 in primary alcohol biosynthesis of cuticular wax in hexaploid wheat, *Plant Cell Physiol.* 56  
394 (2015) 19-44. DOI: <https://doi.org/10.1093/pcp/pcv112>
- 395 [19] M.G. Aarts, W.G. Dirkse, W.H. Stiekema, et al., Transposon tagging of a male sterility  
396 gene in *Arabidopsis*, *Nature* 363 (1993) 715. DOI: [10.1038/363715a0](https://doi.org/10.1038/363715a0)
- 397 [20] J. Shi, D. Zhang, Defective pollen wall is required for anther and microspore  
398 development in rice and encodes a fatty acyl carrier protein reductase, *Plant Cell* 23 (2011)  
399 2225-2246. DOI: <https://doi.org/10.1105/tpc.111.087528>
- 400 [21] Y. Wang, Y.L. Sun, Q. You, et al., Three fatty acyl-coenzyme a reductases, *BdFAR1*,  
401 *BdFAR2*, *BdFAR3*, are involved in primary alcohols biosynthesis of cuticular wax in  
402 *Brachypodium Distachyon*, *Plant Cell Physiol.* 59 (2018) 527-543. DOI:  
403 <https://doi.org/10.1093/pcp/pcx211>.
- 404 [22] F. Domergue, S.J. Vishwanath, J. Joubès, et al., Three *Arabidopsis* fatty  
405 acyl-coenzyme a reductases, FAR1, FAR4, and FAR5, generate primary fatty lcohols  
406 associated with suberin deposition, *Plant Physiol.* 153 (2010) 1539–1554. DOI:  
407 <https://doi.org/10.1104/pp.110.158238>

- 408 [23] A.A. Dobritsa, J. Shrestha, M. Morantet, et al., CYP704B1 is a long-chain fatty acid  
409 omega-hydroxylase essential for sporopollenin synthesis in pollen of *Arabidopsis*, Plant  
410 Physiol. 151 (2009) 574-589. DOI: [10.1104/pp.109.144469](https://doi.org/10.1104/pp.109.144469)
- 411 [24] W. Chen, X.H. Yu, K. Zhang, et al., Male sterile2 encodes a plastid-localized fatty acyl  
412 carrier protein reductase required for pollen exine development in *Arabidopsis*, Plant  
413 Physiol. 157 (2011) 842. DOI: [10.1104/pp.111.181693](https://doi.org/10.1104/pp.111.181693)
- 414 [25] O. Rowland, H. Zheng, S.R. Hepworth, et al., CER4 encodes an alcohol-forming Fatty  
415 acyl-Coenzyme a reductase involved in cuticular wax production in *Arabidopsis*, Plant  
416 Physiol. 142 (2006) 866-877. DOI: [10.1104/pp.106.086785](https://doi.org/10.1104/pp.106.086785)
- 417 [26] Z. Wang, O. Guhling, R. Yao, et al., Two oxidosqualene cyclases responsible for  
418 biosynthesis of Tomato fruit cuticular triterpenoids, Plant Physiol. 155 (2011) 540.  
419 DOI: [10.1104/pp.110.162883](https://doi.org/10.1104/pp.110.162883)
- 420 [27] R. Mago, L. Tabe, S. Vautrin, et al., Major haplotype divergence including multiple  
421 germin-like protein genes, at the wheat Sr2 adult plant stem rust resistance locus, BMC  
422 Plant Biol. 14 (2014) 379. DOI: [10.1186/s12870-014-0379-z](https://doi.org/10.1186/s12870-014-0379-z)
- 423 [28] B. Bjellqvist, B. Basse, E. Olsen, et al., Reference points for comparisons of  
424 two-dimensional maps of proteins from different human cell types defined in a pH scale  
425 where isoelectric points correlate with polypeptide compositions, Electrophoresis 15 (1994)  
426 529–539. DOI: [10.1002/elps.1150150171](https://doi.org/10.1002/elps.1150150171)
- 427 [29] J.D. Thompson, T.J. Gibson, F. Plewniak, et al., The CLUSTAL\_X windows interface:  
428 flexible strategies for multiple sequence alignment aided by quality analysis tools, Nucleic  
429 Acids Res. 25 (1997) 4876-4882. DOI: [10.1093/nar/25.24.4876](https://doi.org/10.1093/nar/25.24.4876)

- 430 [30] A. MarchlerBauer, M.K. Derbyshire, N.R. Gonzales, et al., CDD: NCBI's conserved  
431 domain database, *Nucleic Acids Res.* 43 (2015) D222. DOI: [10.1093/nar/gku1221](https://doi.org/10.1093/nar/gku1221)
- 432 [31] T.L. Bailey, M. Boden, F.A. Buske, et al., MEME SUITE: tools for motif discovery and  
433 searching, *Nucleic Acids Res.* 37 (2009) 202-8. DOI: [10.1093/nar/gkp335](https://doi.org/10.1093/nar/gkp335)
- 434 [32] S. Kumar, G. Stecher, K. Tamura, MEGA7: molecular evolutionary genetics analysis  
435 version 7.0 for bigger datasets, *Mol. Biol. Evol.* 33 (2016) 1870.  
436 DOI: [10.1093/molbev/msw054](https://doi.org/10.1093/molbev/msw054)
- 437 [33] C. Ravel, S. Fiquet, J. Boudet J, et al., Conserved cis-regulatory modules in  
438 promoters of genes encoding wheat high-molecular-weight glutenin subunits, *Front. Plant*  
439 *Sci.* 5 (2014) 621. DOI: [10.3389/fpls.2014.00621](https://doi.org/10.3389/fpls.2014.00621)
- 440 [34] M.B. Eisen, P.T. Spellman, P.O. Brown, et al., Cluster analysis and display of  
441 genome-wide expression patterns, *Proc. Natl. Acad. Sci. U. S. A.* (1998) 14863-14868.  
442 DOI: [10.1073/pnas.95.25.14863](https://doi.org/10.1073/pnas.95.25.14863)
- 443 [35] H.L. Ma, J. Zhao, Genome-wide identification, classification, and expression analysis  
444 of the arabinogalactan protein gene family in rice (*Oryza sativa* L.), *J. Exp. Bot.* 61 (2010)  
445 2647. DOI: [10.1093/jxb/erq104](https://doi.org/10.1093/jxb/erq104)
- 446 [36] F. Beisson, Y. Li-Beisson, M. Pollard, Solving the puzzles of cutin and suberin  
447 polymer biosynthesis, *Curr. Opin. Plant Biol.* 15 (2012) 329–337.  
448 DOI: [10.1016/j.pbi.2012.03.003](https://doi.org/10.1016/j.pbi.2012.03.003)
- 449 [37] P.J. Seo, S.B. Lee, M.C. Suh, et al., The MYB96 transcription factor regulates  
450 cuticular wax biosynthesis under drought conditions in *Arabidopsis*, *Plant Cell* 23 (2011)  
451 1138. DOI: [10.1105/tpc.111.083485](https://doi.org/10.1105/tpc.111.083485)

- 452 [38] H. Abe, K. Yamaguchishinozaki, T. Urao, et al., Role of arabidopsis MYC and MYB  
453 homologs in drought- and abscisic acid-regulated gene expression, *Plant Cell* 9 (1997)  
454 1859-1868. **DOI:** [10.2307/3870530](https://doi.org/10.2307/3870530)
- 455 [39] B.J. Chen, Y. Wang, Y.L. Hu, et al., Cloning and characterization of a drought-inducible  
456 MYB gene from *Boea crassifolia*, *Plant Sci.* 168 (2005) 493-500.  
457 **DOI:** [10.1016/j.plantsci.2004.09.013](https://doi.org/10.1016/j.plantsci.2004.09.013)
- 458



**A**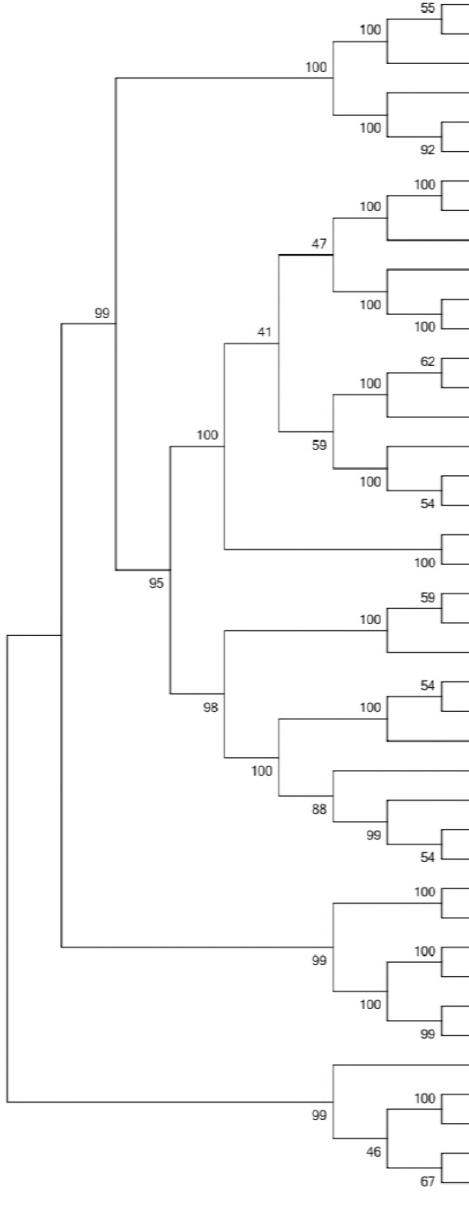**B**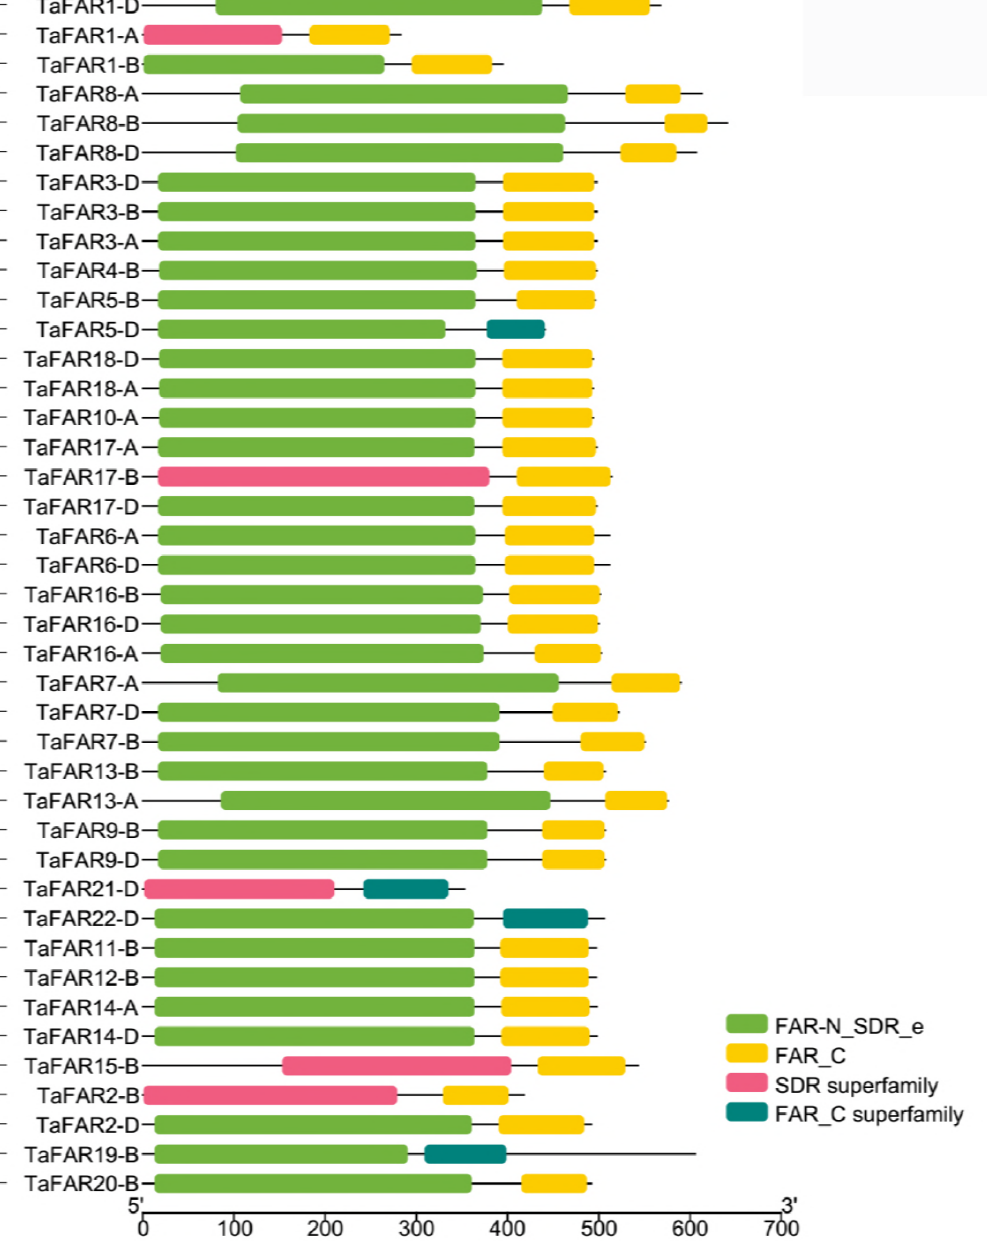

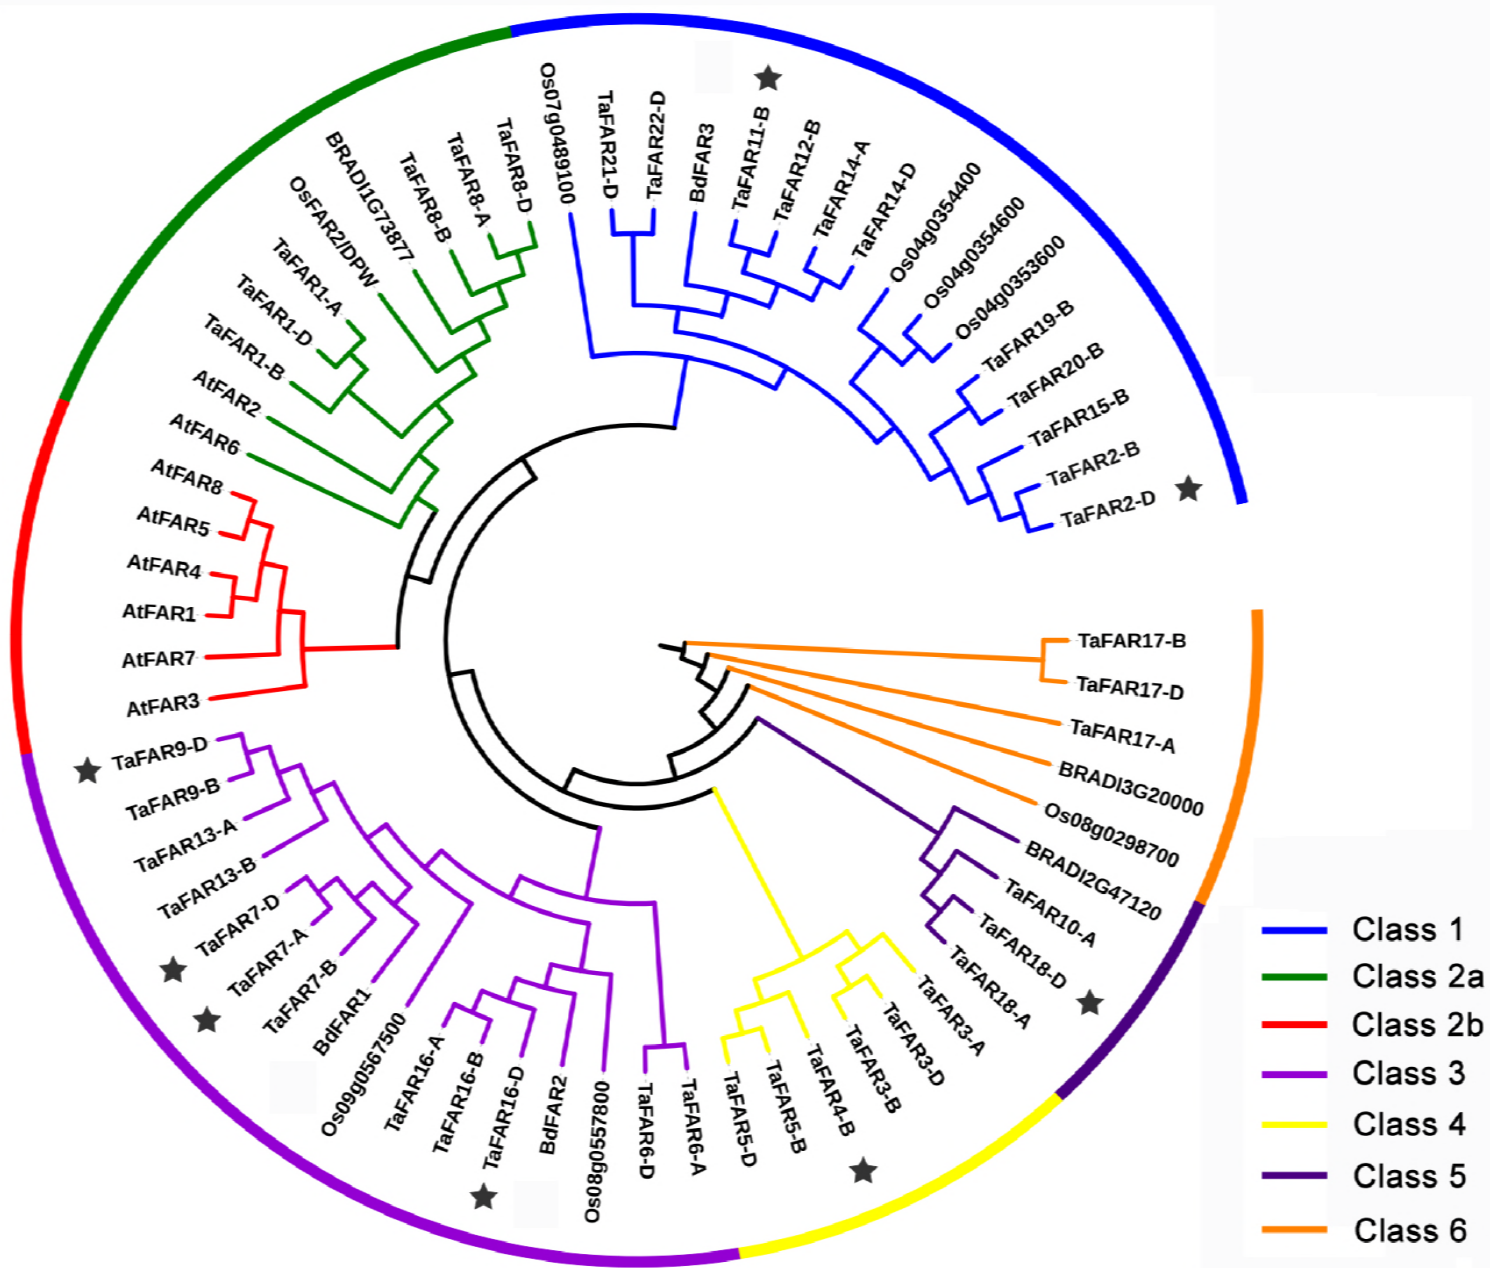

**A**

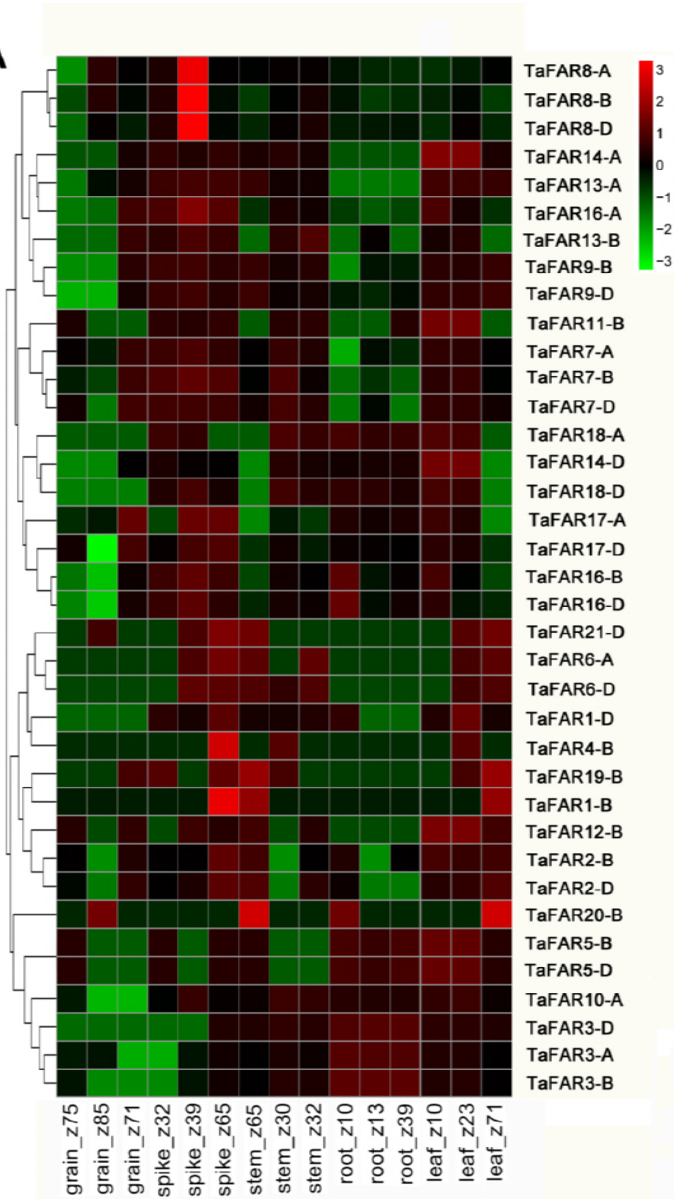

**B**

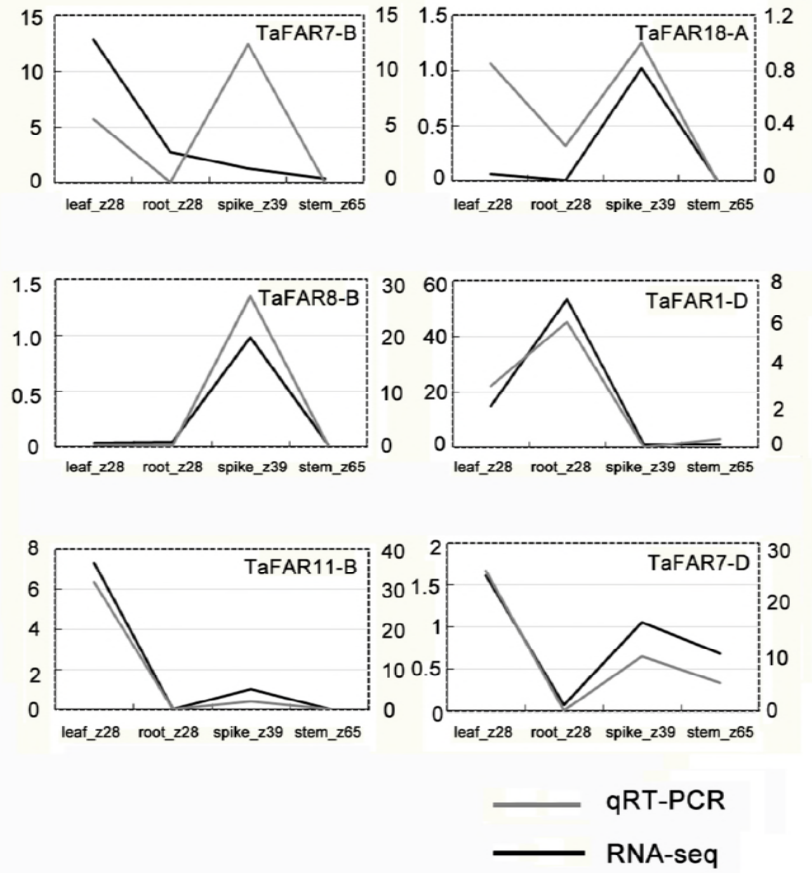

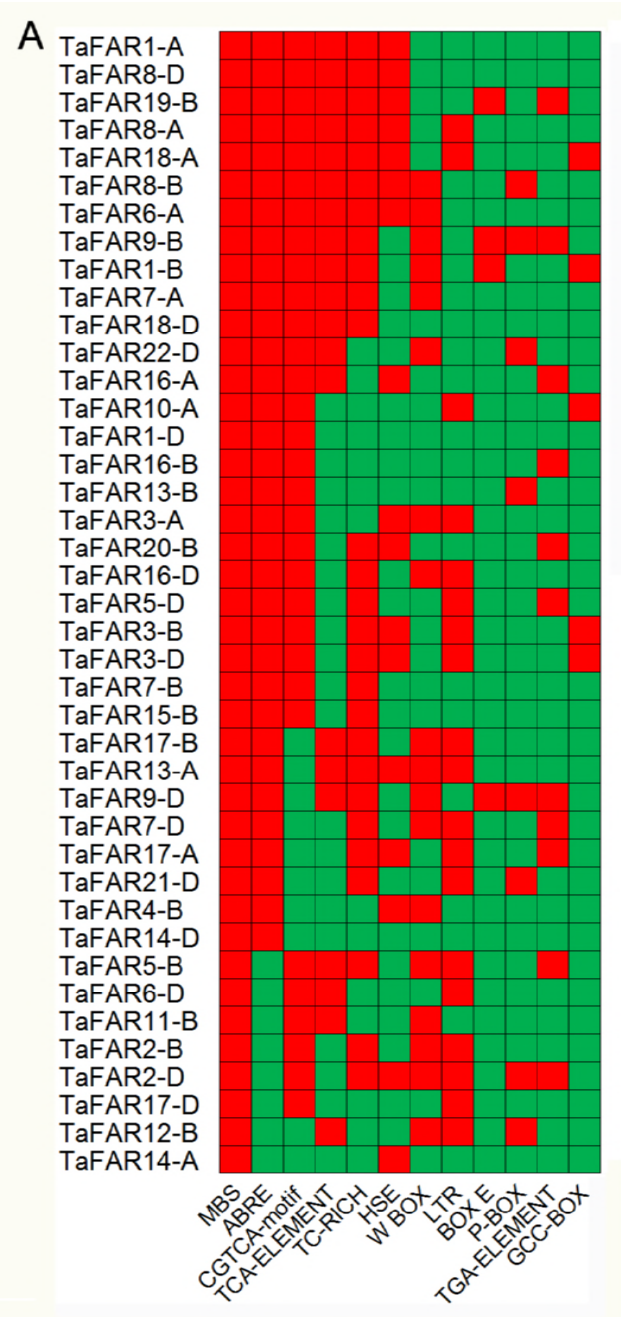

**B**

| Binding site of ID | Function of the site                                              |
|--------------------|-------------------------------------------------------------------|
| MBS                | MYB binding site involved in drought-inducibility                 |
| TC-RICH REPEATS    | cis-acting element involved in defense and stress responsiveness  |
| W BOX              | elicitation; wounding and pathogen responsiveness. Binds WRKY     |
| GCC-BOX            | elicitation; wounding and pathogen responsiveness                 |
| BOX E              | cis-element for induction upon fungal elicitation                 |
| HSE                | cis-acting element involved in heat stress responsiveness         |
| LTR                | cis-acting element involved in low-temperature responsiveness     |
| TGA-ELEMENT        | auxin-responsive element                                          |
| ABRE               | cis-acting element involved in the abscisic acid responsiveness   |
| CGTCA-motif        | cis-acting regulatory element involved in the MeJA-responsiveness |
| TCA-ELEMENT        | cis-acting element involved in salicylic acid responsiveness      |
| P-BOX              | gibberellin-responsive element                                    |

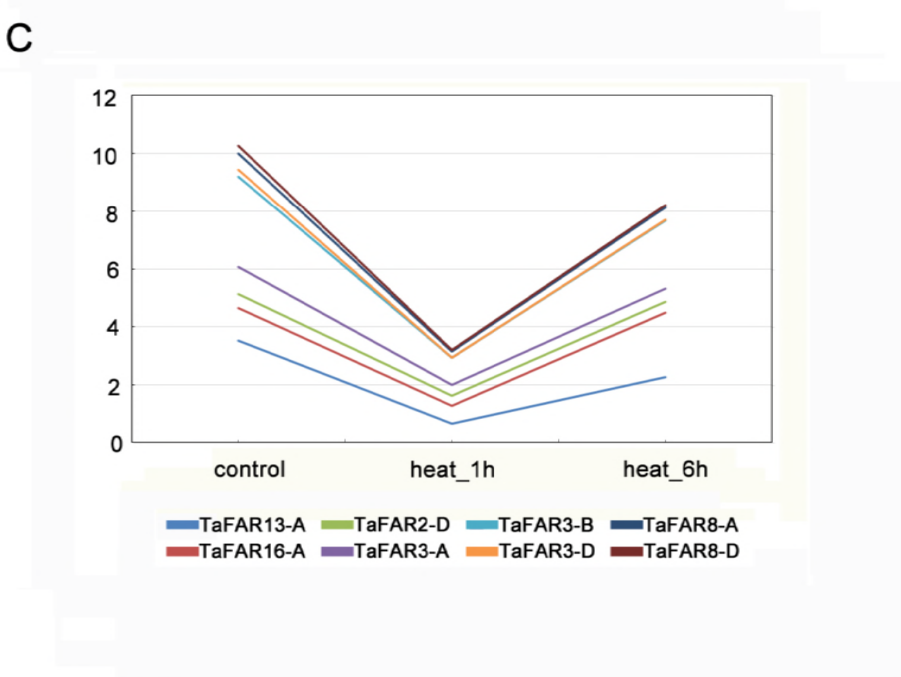

Source: https://www.biorxiv.org/content/10.1101/424739v1.full.pdf
